# Supplementary material for: Re-evaluation of the yield response to phosphorus fertilization based on meta-analyses of long-term field experiments
Source: Springer Nature journal article supplement (doi:10.1007/s13280-017-0971-1), 2017-11-20
Supplement: MOESM1 [file 15654956]

*Ambio*

**Electronic Supplementary Material**

**Title: Re-evaluation of the yield response to phosphorus fertilization based on meta-analyses of long-term field experiments**

Authors: Uwe Buczko, Michael van Laak, Bettina Eichler-Löbermann, Wolfgang Gans, Ines Merbach, Kerstin Panten, Edgar Peiter, Thomas Reitz, Heide Spiegel, Sabine v. Tucher

**Table S1** Details about the institutions performing the field experiments and the corresponding field sites

| <b>Institute</b>                                                                          | <b>Contact</b>                                                                       | <b>Field experiment</b>                        | <b>description</b>                                                                                                                                                  | <b>References</b>         |
|-------------------------------------------------------------------------------------------|--------------------------------------------------------------------------------------|------------------------------------------------|---------------------------------------------------------------------------------------------------------------------------------------------------------------------|---------------------------|
| Helmholtz-Centre for Environmental Research (Helmholtz-Zentrum für Umweltforschung – UFZ) | Dr. Ines Merbach<br>( <a href="mailto:ines.merbach@ufz.de">ines.merbach@ufz.de</a> ) | Static Fertilization Experiment Bad Lauchstädt | Experiment conducted since 1902, focus on the effects of mineral and organic fertilizers on ecosystem processes and services, 18 different fertilization treatments | Merbach and Schulz (2012) |
| Mecklenburg-Vorpommern Research Centre for Agriculture and Fisheries (Landesforschungs-   | Dr. Ines Bull<br>( <a href="mailto:i.bull@lfa.mvnet.de">i.bull@lfa.mvnet.de</a> )    | Static P/K-Fertilization Experiment Gülzow     | start in 1997, rotation: winter rape – winter wheat –                                                                                                               | Boelcke (2007)            |

|                                                                                                                                   |                                                                                                              |                                                                         |                                                                                                                                                |                                         |
|-----------------------------------------------------------------------------------------------------------------------------------|--------------------------------------------------------------------------------------------------------------|-------------------------------------------------------------------------|------------------------------------------------------------------------------------------------------------------------------------------------|-----------------------------------------|
| <p>nstalt für<br/>Landwirtschaft und<br/>Fischerei<br/>Mecklenburg-<br/>Vorpommern)</p>                                           |                                                                                                              |                                                                         | <p>potato –<br/>winter<br/>barley,<br/>treatments<br/>with<br/>different P-<br/>and K-<br/>fertilization,<br/>only mineral<br/>fertilizers</p> |                                         |
| <p>Agricultural research<br/>station Kamperhof<br/>(Landwirtschaftliche<br/>Versuchsanstalt<br/>Kamperhof)<br/>Mülheim / Ruhr</p> | <p>Dr. Martin Rex<br/>(<a href="mailto:rex@hk-kalke.de">rex@hk-<br/>kalke.de</a>)</p>                        | <p>Hohensolms,<br/>Lehsen, Sieversen</p>                                | <p>Since 1994;<br/>fertilizer<br/>type,<br/>application<br/>in autumn or<br/>spring</p>                                                        | <p>Rex<br/>(1999)</p>                   |
| <p>Chair of Plant<br/>Nutrition, TU<br/>Munich (Lehrstuhl<br/>für<br/>Pflanzenernährung<br/>TU München)</p>                       | <p>Dr. Sabine von<br/>Tucher<br/>(<a href="mailto:tucher@wzw.tu-muenchen.de">tucher@wzw.tu<br/>m.de</a>)</p> | <p>Static<br/>Research Station<br/>Freising-Dürnast<br/>016+021/022</p> | <p>016 since<br/>1978<br/>application<br/>of P fertilizer<br/>and lime;<br/>021/022<br/>since 1979<br/>application</p>                         | <p>von<br/>Tucher et<br/>al. (2016)</p> |

|                                                                                                                                |                                                     |                                                                                                             |                                                                                                                                                                                                                                                                 |                                                              |
|--------------------------------------------------------------------------------------------------------------------------------|-----------------------------------------------------|-------------------------------------------------------------------------------------------------------------|-----------------------------------------------------------------------------------------------------------------------------------------------------------------------------------------------------------------------------------------------------------------|--------------------------------------------------------------|
|                                                                                                                                |                                                     |                                                                                                             | of P, mineral<br>N and<br>organic<br>matter                                                                                                                                                                                                                     |                                                              |
| Austrian Agency for<br>Health and Food<br>Safety<br>(Österreichische<br>Agentur für<br>Gesundheit und<br>Ernährungssicherheit) | Dr. Heide Spiegel<br>(adelheid.spiegel<br>@ages.at) | Three long-term<br>P-field<br>experiments in<br>Lower Austria<br>(Fuchsenbigl,<br>Rottenhaus and<br>Zwettl) | Long-term P-<br>field<br>experiments<br>conducted<br>from 1956<br>to 2004<br>(Zwettl) / to<br>2014 (in<br>Fuchsenbigl<br>and<br>Rottenhaus)<br>studying the<br>effects of<br>different<br>types<br>(Super-P,<br>Thomas-P,<br>Hyper-P and<br>quantities of<br>P- | Spiegel et<br>al. (2001);<br>Lindentha<br>l et al.<br>(2003) |

|                                                                                                                                               |                                                                                                                                                                                                                                              |                                                                                            |                                                                                                                                                                                                                         |                                     |
|-----------------------------------------------------------------------------------------------------------------------------------------------|----------------------------------------------------------------------------------------------------------------------------------------------------------------------------------------------------------------------------------------------|--------------------------------------------------------------------------------------------|-------------------------------------------------------------------------------------------------------------------------------------------------------------------------------------------------------------------------|-------------------------------------|
|                                                                                                                                               |                                                                                                                                                                                                                                              |                                                                                            | fertilisation<br>on crop and<br>soil<br>parameters                                                                                                                                                                      |                                     |
| Plant Nutrition<br>Laboratory, Institute<br>of Agricultural and<br>Nutritional Sciences,<br>Martin Luther<br>University Halle -<br>Wittenberg | Prof. Dr. Edgar<br>Peiter<br>( <a href="mailto:edgar.peiter@landw.uni-halle.de">edgar.peiter@landw.uni-halle.de</a> ),<br>Dr. Wolfgang<br>Gans<br>( <a href="mailto:wolfgang.gans@landw.uni-halle.de">wolfgang.gans@landw.uni-halle.de</a> ) | Phosphate<br>Fertilization<br>Experiment<br>(Field D), J. Kühn-<br>Field, Halle<br>(Saale) | Experiment<br>initiated<br>1949 by Karl<br>Schmalfuß;<br>Focus on<br>different<br>annual and<br>triennial P<br>application<br>rates<br>combined<br>with the<br>comparison<br>of<br>superphosph<br>ate and basic<br>slag | Gransee<br>and<br>Merbach<br>(2000) |
| Julius Kühn Institute<br>(JKI), Dept for Crop<br>and Soil Science;                                                                            | Dr. Kerstin<br>Panten<br>( <a href="mailto:kerstin.panten">kerstin.panten</a> )                                                                                                                                                              | Long-term P-<br>fertilization<br>experiment in                                             | From 1985-<br>1997;<br>Variables:                                                                                                                                                                                       | Vogeler et<br>al. (2009)            |

|                                                                                                              |                                                                                                          |                                                                                    |                                                                                                                |                            |
|--------------------------------------------------------------------------------------------------------------|----------------------------------------------------------------------------------------------------------|------------------------------------------------------------------------------------|----------------------------------------------------------------------------------------------------------------|----------------------------|
| Julius Kühn-Institut (JKI), Institut für Pflanzenbau und Bodenkunde                                          | @julius-kuehn.de)                                                                                        | Braunschweig                                                                       | fertilizer type, amount, time of application                                                                   |                            |
| Agricultural technology center Augustenberg (Landwirtschaftliche Technologiezentrum Augustenberg), Karlsruhe | Dr. Markus Mokry<br><a href="mailto:markus.mokry@ltz.bwl.de">markus.mokry@ltz.bwl.de</a>                 | Blaufelden, Schw. Gmünd, Emmendingen, Tuttlingen, Pfullendorf, Biberach, Ladenburg | Duration 1984 – 1993<br>Objective effectiveness of P-fertilization as a function of soil P and class divisions | Mokry (1996)               |
| Landesbetrieb Landwirtschaft Hessen                                                                          | Dr. Johannes Heyn / Dierk Koch<br><a href="mailto:dierk.koch@llh.hessen.de">dierk.koch@llh.hessen.de</a> | 11 sites in Hesse (see Table 1)                                                    | Various duration, starting in 1974; effectiveness of P fertilization as function of soil P                     | Schaumburg and Heyn (1996) |

|                                       |                                                                                                                           |                                                                                                                                                                                                                                                                                                                        | content                                                                       |                                                                                                                         |
|---------------------------------------|---------------------------------------------------------------------------------------------------------------------------|------------------------------------------------------------------------------------------------------------------------------------------------------------------------------------------------------------------------------------------------------------------------------------------------------------------------|-------------------------------------------------------------------------------|-------------------------------------------------------------------------------------------------------------------------|
| University of Rostock, Chair Agronomy | Prof. Bettina Eichler-Löbermann<br>( <a href="mailto:bettina.eichler@uni-rostock.de">bettina.eichler@uni-rostock.de</a> ) | since 1998<br>- split plot design<br>whereas organic fertilization constitutes the main plots (applied every third year), mineral P fertilization constitutes the sub plots (applied every year), and management practice constitutes the sub-sub plots<br>- three levels of organic fertilizers (zero, cattle manure, | Long-term P management strategies including organic and inorganic fertilizers | Requejo & Eichler-Löbermann (2014), Krey et al. (2013), Eichler-Löbermann et al. (2007) Eichler-Löbermann et al. (2008) |

|  |  |                                                                                                                                                                               |  |  |
|--|--|-------------------------------------------------------------------------------------------------------------------------------------------------------------------------------|--|--|
|  |  | biowaste<br>compost), three<br>levels of<br>inorganic<br>fertilizers (zero,<br>TripleSuper<br>autumn<br>application,<br>TripleSuper<br>spring<br>application/biom<br>ass ash) |  |  |
|--|--|-------------------------------------------------------------------------------------------------------------------------------------------------------------------------------|--|--|
